# Supplementary material
Source: PubMed Central journal article supplement (PMC10543396)
Supplement: NIHMS1895285-supplement-1.pdf [file NIHMS1895285-supplement-1.pdf]

Supplemental table 1: Study definitions

|                                                                              |                                                                                                                                                                                                                                                                                                                                                                                                                                                                                                                                                                                                                                                                                                                                                                                                                                                                                                                                                                                                                                  |
|------------------------------------------------------------------------------|----------------------------------------------------------------------------------------------------------------------------------------------------------------------------------------------------------------------------------------------------------------------------------------------------------------------------------------------------------------------------------------------------------------------------------------------------------------------------------------------------------------------------------------------------------------------------------------------------------------------------------------------------------------------------------------------------------------------------------------------------------------------------------------------------------------------------------------------------------------------------------------------------------------------------------------------------------------------------------------------------------------------------------|
| Imaging modalities included to determine presence of large vessel vasculitis | <ol style="list-style-type: none"> <li>1) Computed tomography angiography (CTA)</li> <li>2) Magnetic resonance angiography (MRA)</li> <li>3) 18F-Fluorodeoxyglucose Positron emission tomography (PET)</li> <li>4) 18F-Fluorodeoxyglucose Positron emission tomography with computed tomography (PET-CT)</li> <li>5) Colour duplex sonography (CDS)</li> </ol>                                                                                                                                                                                                                                                                                                                                                                                                                                                                                                                                                                                                                                                                   |
| Arterial findings consistent with presence of large vessel vasculitis        | <ol style="list-style-type: none"> <li>1) Non-atherosclerotic wall thickening <math>\geq 2</math> mm (CTA, MRA)</li> <li>2) Delayed contrast enhancement (CTA, MRA)</li> <li>3) Non-atherosclerotic arterial stenosis or occlusion (CTA, MRA)</li> <li>4) Increased arterial hypermetabolism (higher than liver uptake) [PET, PET-CT]</li> <li>5) Hypoechoic wall thickening, temporal artery (CDS)</li> </ol>                                                                                                                                                                                                                                                                                                                                                                                                                                                                                                                                                                                                                   |
| Remission                                                                    | Absence of signs/symptoms attributable to GCA and absence of elevated erythrocyte sedimentation rate (ESR) or C-reactive protein (CRP)                                                                                                                                                                                                                                                                                                                                                                                                                                                                                                                                                                                                                                                                                                                                                                                                                                                                                           |
| Relapse                                                                      | <p>Defined as either of the following if GC therapy was increased with subsequent improvement:</p> <ol style="list-style-type: none"> <li>(i) new onset or reappearance of signs/symptoms compatible with GCA with an associated increase in inflammatory markers [<i>symptom + lab relapse</i>]</li> <li>(ii) new onset or reappearance of signs/symptoms compatible with GCA without an associated increase in inflammatory markers [<i>symptom only relapse</i>]</li> <li>(iii) isolated increase in inflammatory markers without GCA signs/symptoms or other explainable etiology present (particularly infection). Laboratory elevation had to be persistent over two separate readings <math>\geq 2</math> weeks apart. In accordance with local laboratory standard references ranges, inflammatory marker elevation was defined as a CRP level <math>&gt;8</math> mg/l and/or ESR by the Westergren method <math>&gt;22</math> mm/h for men and <math>&gt;29</math> mm/h for women [<i>lab only relapse</i>].</li> </ol> |

|                                    |                                                                                                                                                                                                                                                                                                                                                                                                                                                                                                                       |
|------------------------------------|-----------------------------------------------------------------------------------------------------------------------------------------------------------------------------------------------------------------------------------------------------------------------------------------------------------------------------------------------------------------------------------------------------------------------------------------------------------------------------------------------------------------------|
| Active disease                     | Ongoing sign/symptoms and/or ongoing elevated ESR/CRP attributable to GCA for which remission has not been achieved.                                                                                                                                                                                                                                                                                                                                                                                                  |
| Adverse events of special interest | <p>Hepatotoxicity (elevation &gt; 3 times the upper limit of normal)</p> <p>Myocardial infarction</p> <p>Deep vein thrombosis</p> <p>Pulmonary embolism</p> <p>Anaphylaxis</p> <p>Intractable nausea</p> <p>Severe diarrhea</p> <p>Diverticulitis</p> <p>Bowel perforation</p> <p>Infection requiring hospitalization</p> <p>Fracture</p> <p>Cancer</p> <p>Anemia with hemoglobin &lt; 8 gm/dl</p> <p>Neutropenia with absolute count &lt; 500</p> <p>Thrombocytopenia with platelets &lt; 10 x 10<sup>9</sup>/ul</p> |
| GCA related serious adverse events | <p>Visual loss (transient or fixed)</p> <p>Diplopia</p> <p>Stroke attributable to GCA</p> <p>Critical limb ischemia</p> <p>Aortic aneurysm development</p> <p>Aortic dissection</p>                                                                                                                                                                                                                                                                                                                                   |

**Supplemental Table 2: Distribution of large-vessel arterial findings on computed tomography angiography or magnetic resonance angiography in patients that met radiographic study inclusion criteria but did not fulfill ACR/EULAR 2022 classification criteria**

| Patient | Carotid/Vertebral | Subclavian | Thoracic<br>Aorta | Abdominal<br>Aorta | Iliofemoral |
|---------|-------------------|------------|-------------------|--------------------|-------------|
| 1       |                   |            | +                 |                    |             |
| 2       | +                 | +          | +                 | +                  |             |
| 3       |                   |            |                   | +                  | +           |
| 4       |                   |            |                   | +                  |             |
| 5       |                   | +          |                   |                    | +           |
| 6       |                   |            | +                 | +                  |             |
| 7       |                   |            |                   |                    | +           |
| 8       |                   |            | +                 | +                  |             |
| 9       |                   | +          | +                 | +                  |             |
| 10      | +                 | +          | +                 | +                  |             |
| 11      |                   |            | +                 |                    |             |
| 12      | +                 | +          |                   |                    |             |
| 13      |                   | +          | +                 | +                  |             |
| 14      |                   |            | +                 |                    |             |
| 15      |                   | +          | +                 | +                  |             |
| 16      |                   | +          | +                 |                    |             |
| 17      |                   |            |                   |                    | +           |

**Supplemental Table 3. Risk Factors adjusted for age and sex for relapse after TCZ start and after TCZ discontinuation**

| Risk Factors                                   | Relapse after TCZ start, HR (95% CI) | Relapse after TCZ discontinuation HR (95% CI) |
|------------------------------------------------|--------------------------------------|-----------------------------------------------|
| Subcutaneous vs IV TCZ                         | 0.78 (0.39-1.54)                     | 0.35 (0.06-2.04)                              |
| High <sup>a</sup> vs Low <sup>b</sup> dose TCZ | 0.74 (0.43-1.28)                     | 0.75 (0.33-1.70)                              |
| Time to TCZ start after GCA diagnosis          | 0.82 (0.47-1.43)                     | 0.89 (0.41-1.93)                              |
| DMARD at TCZ initiation                        | 0.96 (0.53-1.75)                     | 1.41 (0.61-3.24)                              |
| PMR at GCA diagnosis                           | 1.43 (0.82-2.52)                     | 1.36 (0.63-2.94)                              |
| PMR at TCZ start                               | 1.09 (0.51-2.34)                     | 0.72 (0.22-2.34)                              |
| Vision symptoms at GCA diagnosis               | 1.51 (0.86-2.68)                     | 0.69 (0.29-1.60)                              |
| Vision symptoms at TCZ start                   | 1.10 (0.55-2.21)                     | 0.94 (0.38-2.33)                              |
| Cranial symptoms at GCA diagnosis              | <b>2.29 (1.07-4.91)</b>              | 1.59 (0.58-4.41)                              |
| Cranial symptoms at TCZ start                  | 1.45 (0.83-2.53)                     | 0.93 (0.40-2.15)                              |
| Large Vessel Vasculitis at GCA diagnosis       | 0.80 (0.46-1.42)                     | 1.45 (0.65-3.25)                              |
| Large Vessel Vasculitis at TCZ start           | 0.94 (0.54-1.63)                     | 1.32 (0.60-2.92)                              |
| Never smoker vs ever smoker at GCA diagnosis   | 1.17 (0.66-2.05)                     | 0.55 (0.22-1.34)                              |
| Obesity (BMI ≥30)                              | 1.26 (0.68-2.35)                     | 0.83 (0.34-2.03)                              |
| Diabetes Mellitus at GCA diagnosis             | 0.44 (0.17-1.11)                     | 0.89 (0.29-2.72)                              |
| Aspirin treatment at GCA diagnosis             | 0.64 (0.36-1.14)                     | 0.96 (0.40-2.30)                              |
| Statin treatment at GCA diagnosis              | 1.20 (0.68-2.12)                     | <b>0.38 (0.15-0.97)</b>                       |
| Off glucocorticoids at TCZ start               | 0.60 (0.08-4.42)                     |                                               |
| Glucocorticoid Discontinuation (any time)      | 0.52 (0.25-1.073)                    |                                               |
| Reduction of TCZ dose before stop              |                                      | 1.47 (0.19-11.34)                             |
| Age ≥80 vs <80                                 |                                      | 1.00 (0.98-1.57)                              |
| Duration of TCZ prior to TCZ discontinuation   |                                      | 1.00 (0.98-1.04)                              |
| Sex (reference female)                         | 1.19 (0.69-2.05)                     | 0.99 (0.42-2.35)                              |



**Supplemental Table 4. Risk factors for adverse events of special interest adjusted for age and sex**

| Risk Factor                                    | Hazard Ratio (95% CI)   |
|------------------------------------------------|-------------------------|
| Subcutaneous vs IV TCZ                         | 0.99 (0.15-6.41)        |
| High <sup>a</sup> vs Low dose <sup>b</sup> TCZ | 1.12 (0.43-2.93)        |
| DMARD at TCZ initiation                        | 1.11 (0.40-3.04)        |
| PMR at GCA diagnosis                           | 1.12 (0.42-2.98)        |
| PMR at TCZ start                               | 1.33 (0.38-4.66)        |
| Vision symptoms at GCA diagnosis               | 0.71 (0.24-2.11)        |
| Vision symptoms at TCZ start                   | <b>3.78 (1.35-0.57)</b> |
| Cranial symptoms at GCA diagnosis              | 2.82 (0.64-12.48)       |
| Cranial symptoms at TCZ start                  | 0.58 (0.19-1.77)        |
| Large Vessel Vasculitis at GCA diagnosis       | 0.49 (0.17-1.38)        |
| Large Vessel Vasculitis at TCZ start           | 0.34 (0.11-1.05)        |
| Never vs ever smoker at GCA diagnosis          | 0.64 (0.23-1.79)        |
| Obesity (BMI ≥30)                              | 0.93 (0.30-2.95)        |
| Diabetes Mellitus at GCA diagnosis             | 1.85 (0.59-5.77)        |
| Aspirin treatment at GCA diagnosis             | 1.01 (0.37-2.74)        |
| Statin treatment at GCA diagnosis              | 1.02 (0.36-2.93)        |
| Time to first relapse after TCZ start          | 3.31 (0.95-11.58)       |
| Age ≥80 vs <80                                 | 0.44 (0.04-4.40)        |
| Time to initiation of TCZ after GCA diagnosis  | 1.63 (0.61-4.30)        |
